# Supplementary material for: Study on the relationship between carrier mobility and nonlinear optical characteristics of Sb2Te3–Bi2Te3 lateral heterostructure materials and its applications in fiber lasers
Source: Royal Society of Chemistry journal article supplement (doi:10.1039/d2tc01677j), 2022-01-01
Supplement: d2tc01677j1.pdf [file d2tc01677j1.pdf]

## Supporting information

### The computational process of carrier mobility

The carrier mobility of 2D material is calculated by the deformation potential theory. Owing to the anisotropic in TI materials, it needs to be considered from the x and y directions during the analog computation. Firstly, the material models should change the rhombohedral crystal system into orthorhombic by redefining the lattice because this is convenient for models to apply strains along the x and y directions. The associated models and Brillouin zones selected in calculation are shown in Fig S1.

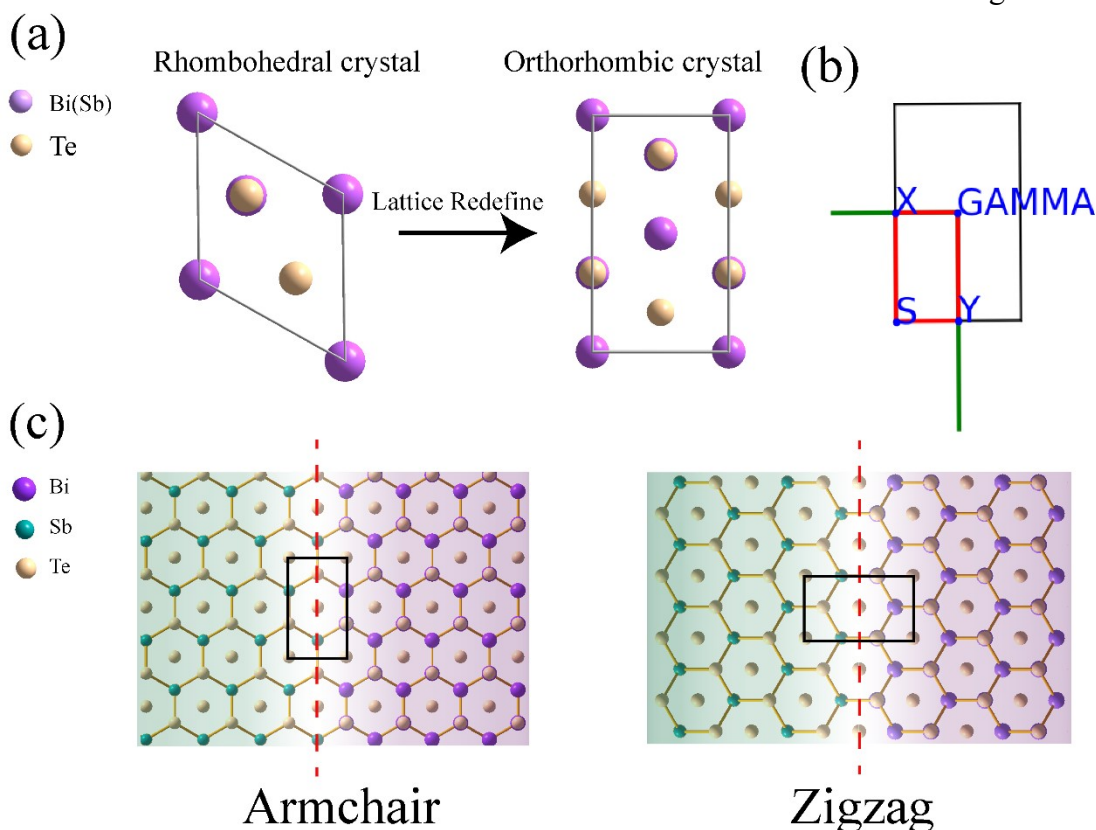

Fig S1. (a) The crystal change of model for computation. (b) Brillouin zone of model for computation. (c) The lateral heterostructure (LHS) models of armchair and zigzag type for computation.

After finishing the building of the material models, the geometry optimization was executed according to the initial parameters. Then a series of strains from -2% to 2% (calculated using a step of 0.5%) along the x and y directions were separately applied in these four models, including  $\text{Bi}_2\text{Te}_3$ ,  $\text{Sb}_2\text{Te}_3$ , LHS of zigzag and armchair type, to make it compression and dilatation by changing the parameters in POSCAR. The total energy of these models in different strains could be acquired by computation. The relation between the strain and total energy was fitted by the quadratic function. The corresponding computation and fitting data of these four models in different strains along the x and y directions were shown in the Fig S2.

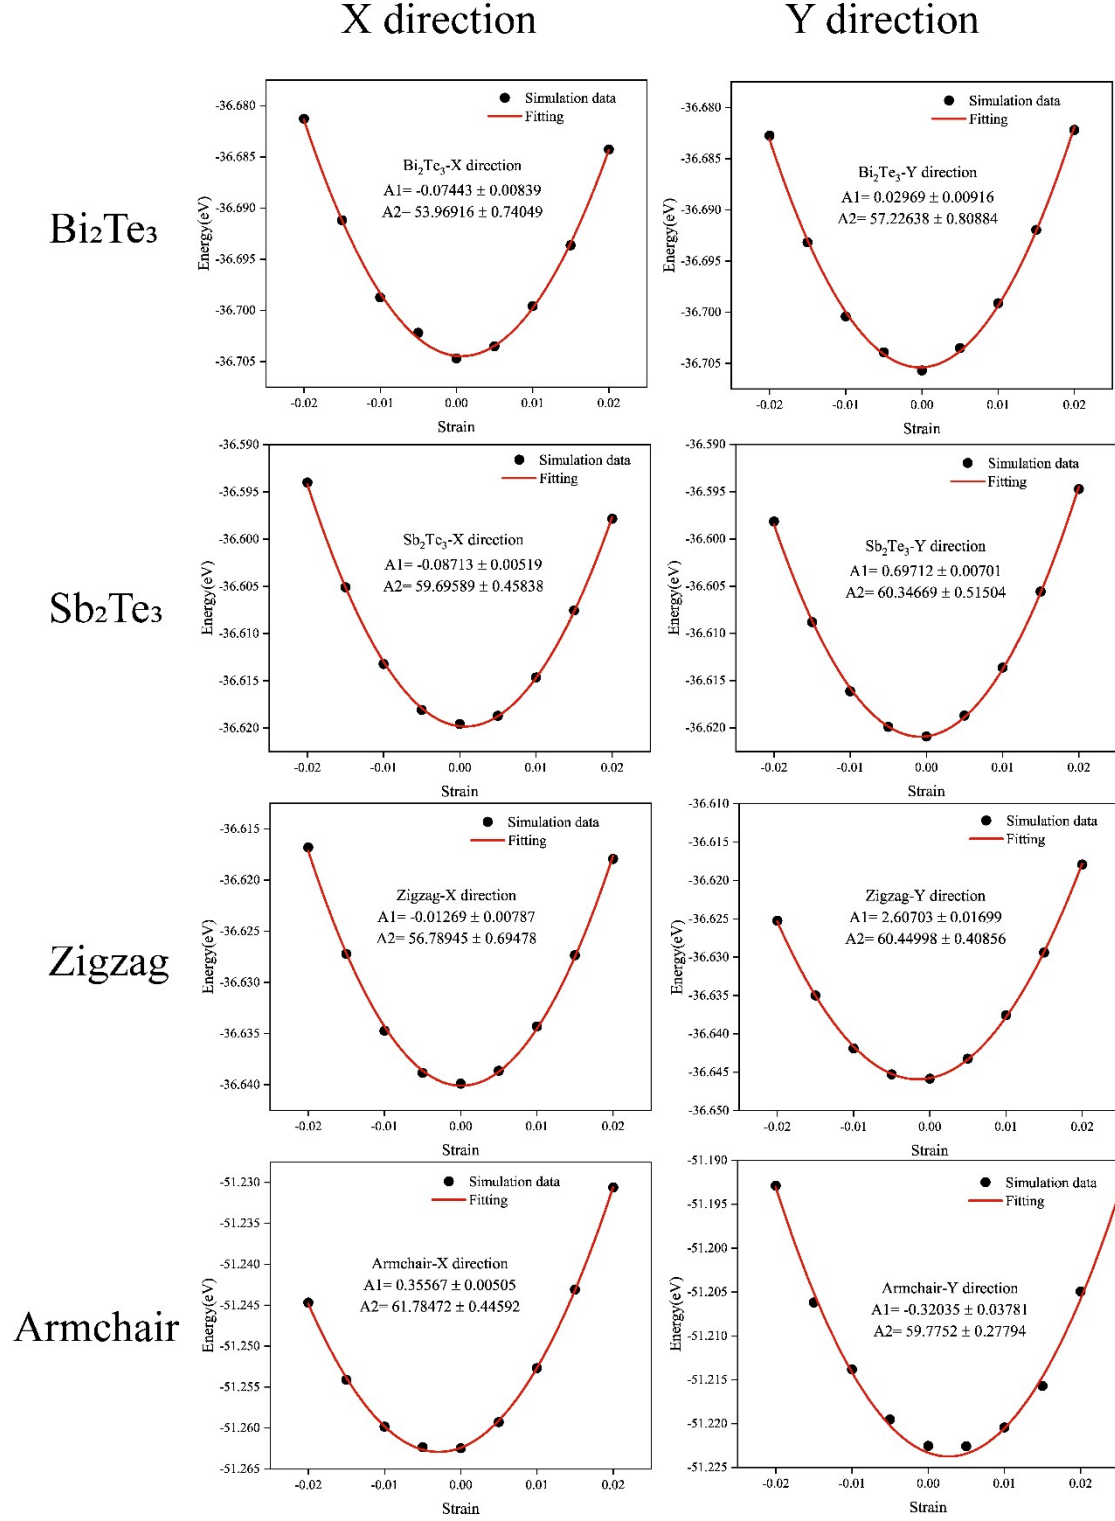

Fig S2. The elastic modulus  $C$  of these four models by computation and fitting.

According to the fitting results, the quadratic term ratio  $A_2$  and monomial term ratio  $A_1$  can be acquired. Then the formula  $C = \left[ \frac{\partial^2 E}{\partial \varepsilon^2} \right] / S_0$  is integrated to  $C = 16 \times 2 \cdot A_2 / S_0$ , where  $S_0$  is surface area of the equilibrium system acquired by the cell

volume. Finally, the elastic modulus of 2D system C can be calculated by the given  $A_2$  and  $S_0$ . The associated parameters are listed in the Table S1.

Table S1 The quadratic term ratio  $A_2$ , surface area  $S_0$ , the elastic modulus C of these four models acquired by the analog computation along the x and y directions.

|                          | X        |        |        | Y        |        |        |
|--------------------------|----------|--------|--------|----------|--------|--------|
|                          | $A_2$    | $S_0$  | C      | $A_2$    | $S_0$  | C      |
| $\text{Bi}_2\text{Te}_3$ | 53.96916 | 34.291 | 50.363 | 57.22638 | 34.291 | 53.403 |
| $\text{Sb}_2\text{Te}_3$ | 59.69589 | 34.291 | 55.708 | 60.34669 | 34.291 | 56.315 |
| Zigzag                   | 56.78945 | 34.291 | 52.995 | 60.44998 | 34.291 | 56.411 |
| Armchair                 | 61.78472 | 34.291 | 57.657 | 59.7752  | 34.291 | 55.782 |

For the deformation potential constant  $E_d$  calculation, the initial models after the geometry optimization and other models after applying different strains were calculated by static self-consistent and non self-consistent calculation in turn. The valence band maximum (VBM), conduction band minimum (CBM), fermi level and vacuum level could be obtained from the band structures after calculation. Then the position changes of band edges in different strains could be figured out by using the vacuum level for reference. The energies of VBM and CBM after changing could also be calculated and the changes in different strains could be linear fitted as shown in Fig S3. According to the fitting results, the deformation potential constant  $E_d$  was the slope of linear fitting.

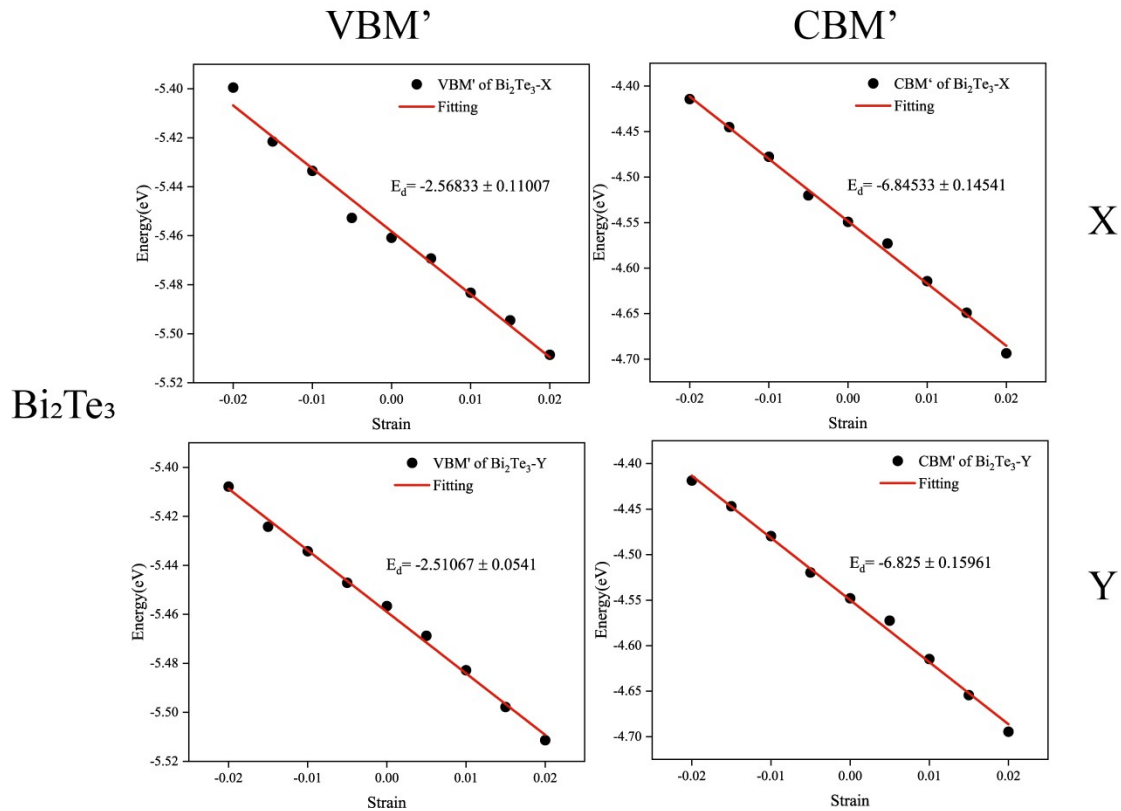

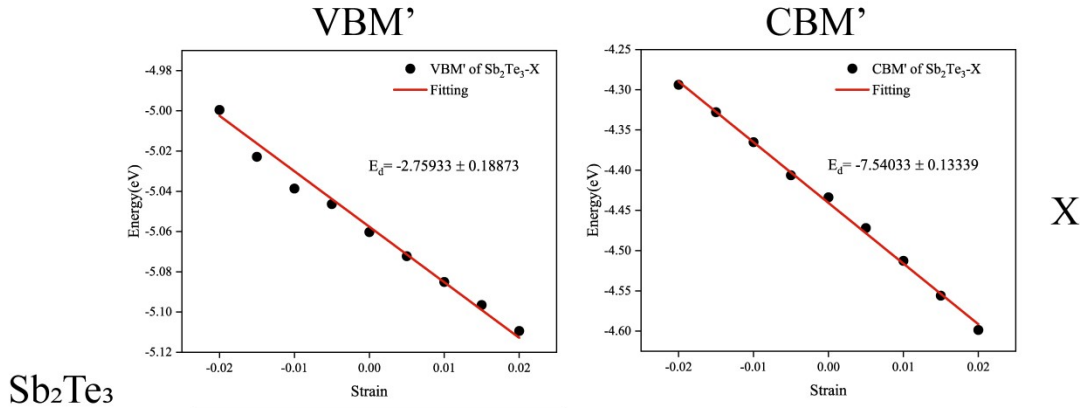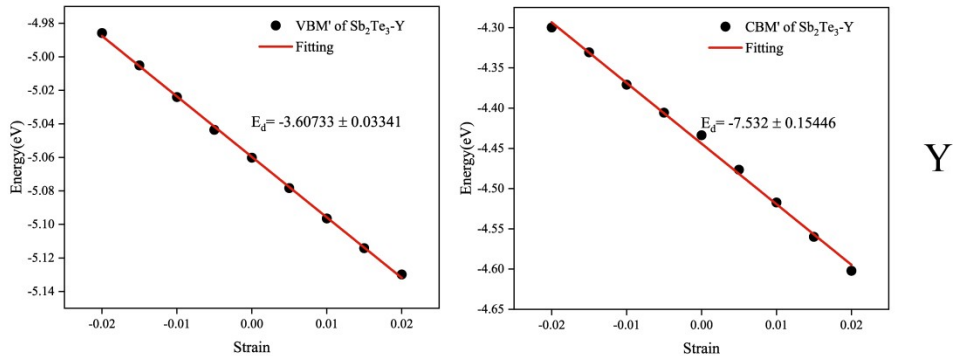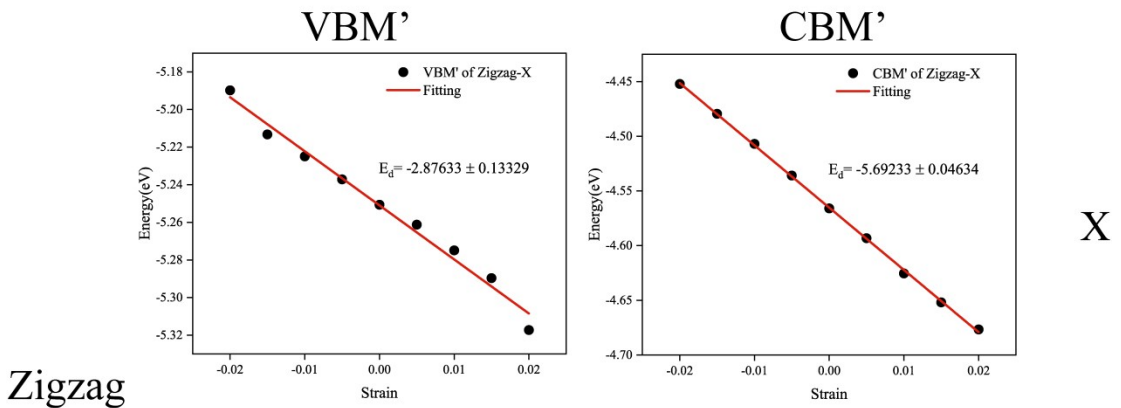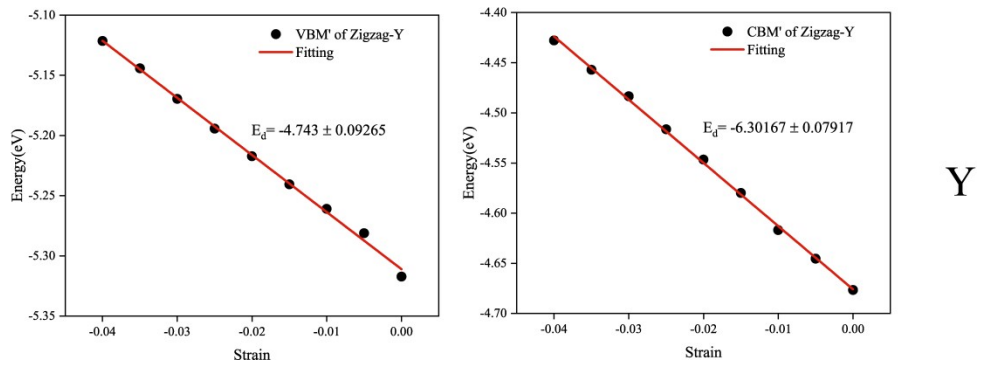

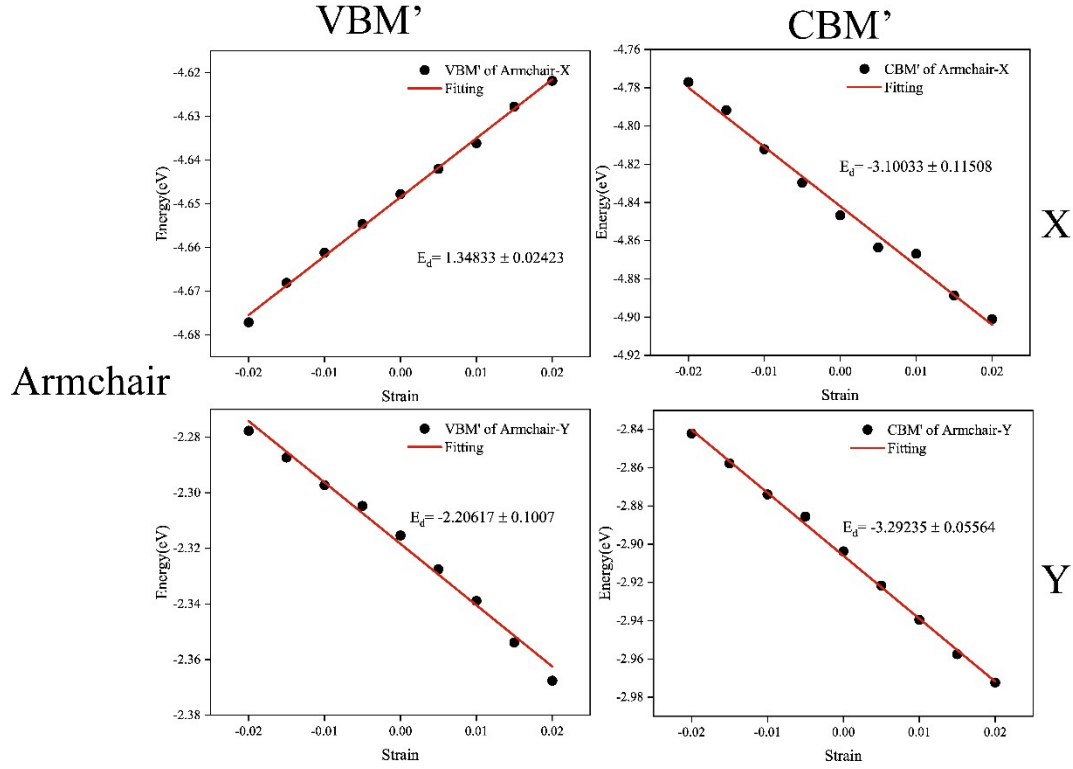

Fig S3. The deformation potential constant  $E_d$  of these four models obtained by fitting the relation between the energy of VBM', CBM' after applying the strains and different strains

The carrier effective mass  $m^*$  is the second derivative of the energy eigenvalue with respect to the high symmetry point K and can be extracted from the band structure calculation along the x and y directions of the VBM and CBM by the vaspkit. The corresponding parameters are listed in the Table S2.

Table S2. The carrier effective mass  $m^*$  of these four models along the x and y directions.

|                          |   | $m^*(m_0)$ |       |
|--------------------------|---|------------|-------|
|                          |   | x          | y     |
| $\text{Bi}_2\text{Te}_3$ | h | 1.717      | 0.438 |
|                          | e | 0.094      | 0.098 |
| $\text{Sb}_2\text{Te}_3$ | h | 0.1        | 0.099 |
|                          | e | 0.104      | 0.102 |
| Zigzag                   | h | 0.086      | 0.091 |
|                          | e | 0.095      | 0.108 |
| Armchair                 | h | 0.189      | 0.213 |
|                          | e | 0.154      | 0.197 |

Finally, the carrier mobility of 2D material can be figured out by acquired

constants  $C$ ,  $E_d$ ,  $m^*$  according the formula  $\mu = \frac{2e\hbar^3 C}{3k_B T |m^*|^2 E_d^2}$ , where  $e$  is the electron charge counted as  $1.6 \times 10^{-19} C$ ,  $k_B$ ,  $T$ , and  $\hbar$  are the Boltzman constant, temperature and

reduced Plank constant taken as  $1.38 \times 10^{-23} m^2 \cdot kg \cdot s^{-2} \cdot K^{-1}$ , 298K and  $1.055 \times 10^{-34} J \cdot s$ , respectively The results are shown in Table S3.

Table S3. The carrier mobility of these four models by calculation.

|                                 | $\mu(cm^2 \cdot V^{-1} \cdot s^{-1})$ |           |          |
|---------------------------------|---------------------------------------|-----------|----------|
|                                 |                                       | x         | y        |
| Bi <sub>2</sub> Te <sub>3</sub> | h                                     | 81.870    | 648.995  |
|                                 | e                                     | 1788.242  | 1754.792 |
| Sb <sub>2</sub> Te <sub>3</sub> | h                                     | 10757.999 | 6492.004 |
|                                 | e                                     | 1331.759  | 1402.557 |
| Zigzag                          | h                                     | 12734.373 | 4451.354 |
|                                 | e                                     | 2664.252  | 1790.098 |
| Armchair                        | h                                     | 13057.679 | 3713.993 |
|                                 | e                                     | 3718.815  | 1949.662 |
